# Supplementary material for: Injectable and biodegradable piezoelectric hydrogel for osteoarthritis treatment
Source: PubMed Central journal article supplement (PMC10558537; doi:10.1038/s41467-023-41594-y), 2023-10-06
Supplement: 41467_2023_41594_MOESM3_ESM.pdf [file 41467_2023_41594_MOESM3_ESM.pdf]

**Title:** Supplementary Movie 1:

**Description:** Injecting Piezoelectric hydrogel with X RAY guidance.

**Title:** Supplementary Movie 2:

**Description:** Injection NFs-PLLA hydrogel using a G-29 needle to show injection ability of the hydrogel with G29 needle.

**Title:** Supplementary Movie 3:

**Description:** Rabbit under US activation treatment.

**Title:** Supplementary Movie 4:

**Description:** Rabbit behaves normally after US activation treatment.
